# Supplementary material
Source: MDPI journal article supplement (https://www.mdpi.com/1424-2818/13/3/119)
Supplement: s1 [file s1]

## Supplementary Materials

**Table S1.** Site history for fifteen sites in the Lake Michigan basin, Michigan, USA. Site codes are listed by anthropogenic barrier-river-upstream/downstream most location. Anthropogenic barriers are D (uncontrolled), H (controlled) R (removal). Rivers are G (Grand River), B (Battle Creek), M (Maple River), R (Rice Creek), C (Red Cedar River), F (Flat River), and K (Kalamazoo River). River locations are 1 (upstream most site) and 2 (downstream most site). NA = not applicable. DT= Distance between transects downstream of dam or dam removal. OP= Original Purpose. RP= Recent Purpose, R = Recreational, G = Grist Mill, F = Flood Control, H = Hydroelectric, C = Cooling Water. ? = unknown.

| Site | Lat      | Long      | Year Built | Year Re-moved | River        | Height (m) | Width (m) | Storage (acre-ft) | OP | RP | DT (m) |
|------|----------|-----------|------------|---------------|--------------|------------|-----------|-------------------|----|----|--------|
| DG1  | 42.76343 | -84.7624  | 1886       | NA            | Grand        | 2.44       | 90        | 1200              | R  | R  | 84     |
| DG2  | 42.98152 | -84.95010 | 1857       | NA            | Grand        | 5.54       | 84        | 1820              | G  | R  | 100    |
| DB1  | 42.33154 | -85.15309 | 1830s      | NA            | Battle Creek | 3.96       | 89        | 200               | G  | R  | 132    |
| DM1  | 43.09027 | -84.40594 | 1840's     | NA            | Maple        | 3.05       | 70        | 80                | F  | F  | 161    |
| DC1  | 42.72912 | -84.48199 | ?          | NA            | Red Cedar    | 1.22       | 26        | ?                 | ?  | ?  | 288    |
| HG1  | 42.49996 | -84.62995 | 1860       | NA            | Grand        | 5.19       | 73        | 300               | G  | H  | 104    |
| HG2  | 42.88877 | -84.93200 | 1894       | NA            | Grand        | 4.57       | 98        | 186               | G  | H  | 83     |
| HB1  | 42.44621 | -85.01625 | 1852       | NA            | Battle Creek | 4.26       | 23        | 252               | G  | H  | 326    |
| HF1  | 43.02069 | -85.29210 | 1915       | NA            | Flat         | 7.01       | 46        | 1500              | H  | H  | 163    |
| HK1  | 42.26248 | -84.95374 | 1892       | NA            | Kalamazoo    | 3.66       | 40        | 1775              | H  | H  | 188    |
| RG1  | 42.64653 | -84.65108 | 1852       | 2006          | Grand        | 3.05       | 62        | NA                | G  | R  | 132    |
| RB1  | 42.54458 | -84.83612 | 1903       | 2006          | Battle Creek | 2.44       | 30        | NA                | C  | R  | 271    |
| RB2  | 42.31865 | -85.17171 | 1909       | 2005          | Battle Creek | 1.07       | 30        | NA                | C  | R  | 297    |
| RR1  | 42.26754 | -84.95370 | 1835       | 2008          | Rice Creek   | 3.66       | 23        | NA                | G  | R  | 360    |
| RC1  | 42.68985 | -84.28456 | 1840       | 1998          | Red Cedar    | 3.20       | 42        | NA                | G  | R  | 197    |

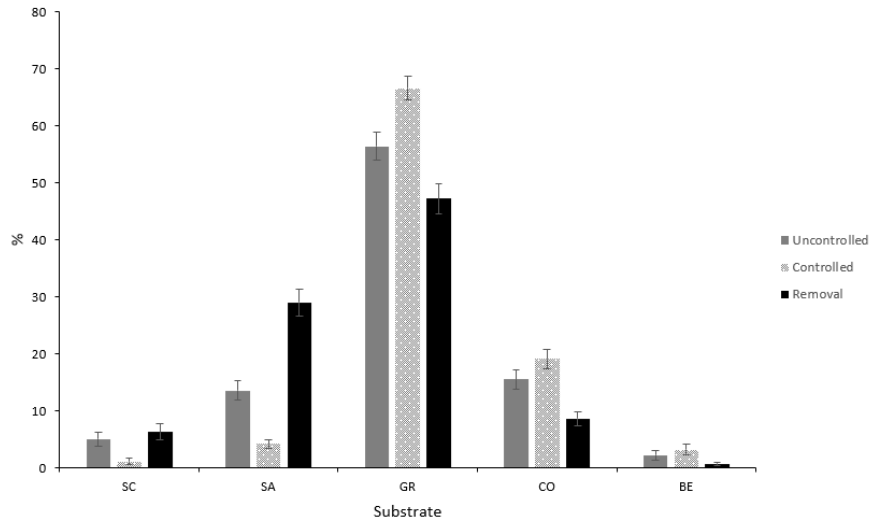

**Figure S1.** Mean percent substrate composition at three anthropogenic barriers in the Lake Michigan basin, Michigan, USA. Substrate types are silt/clay (SC), sand (SA), gravel (GR), cobble (CO), bedrock (BE). Kruskal-Wallis tests were performed within individual substrate groups. Error bars indicate standard error.

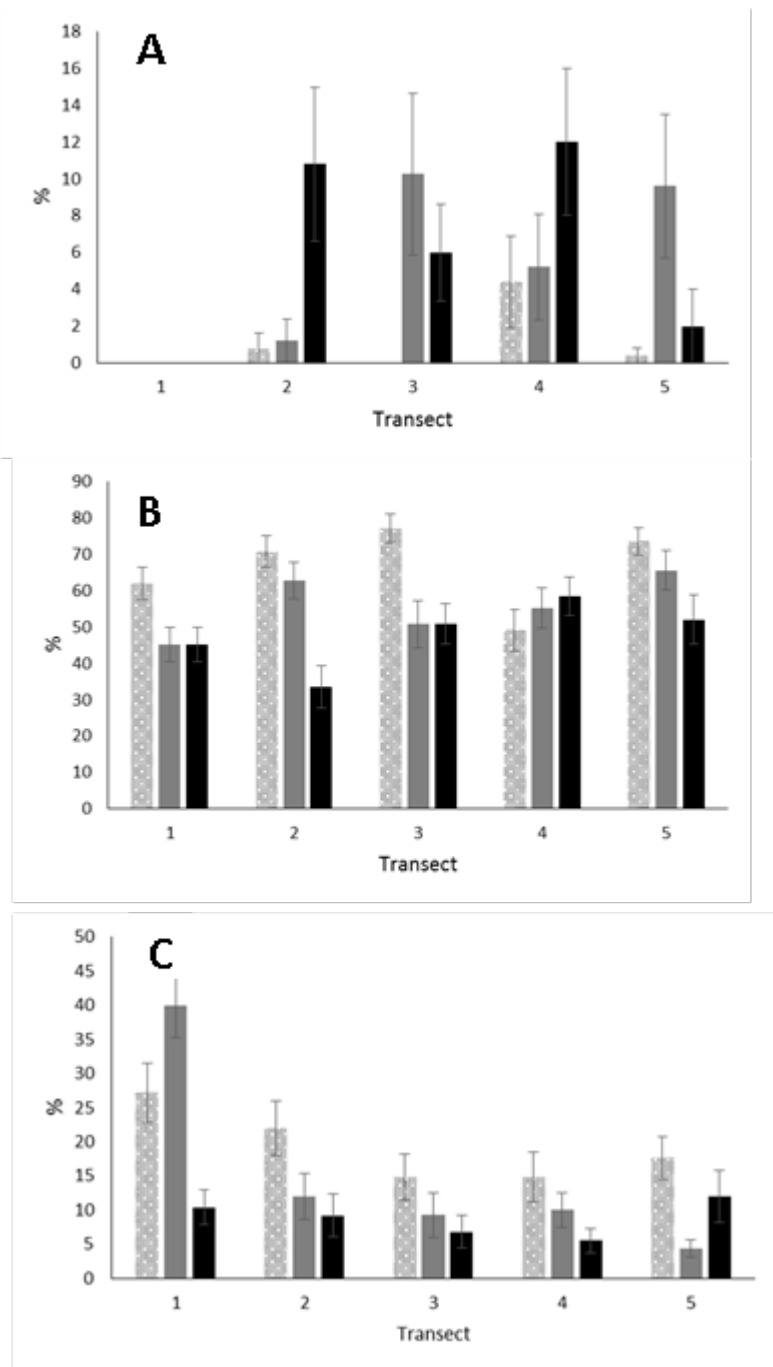

**Figure S2.** Mean percent substrate composition at anthropogenic barriers (n= 5 for each type of barrier) in the Lake Michigan basin, Michigan, USA. (A) silt/clay, (B) gravel, (C) cobble along transects. Error bars indicate standard errors.
